# Supplementary material
Source: PubMed Central journal article supplement (PMC4652048)
Supplement: JB.00345-15_zjb999093835so1.pdf [file JB.00345-15_zjb999093835so1.pdf]

# **Response of *Vibrio cholerae* towards the catecholamine hormones epinephrine and norepinephrine**

**Petra Halang<sup>§1#</sup>, Charlotte Toulouse<sup>§1</sup>, Bernadette Geißel<sup>1</sup>, Bernd Michel<sup>1</sup>, Birgit Flauger<sup>2</sup>, Manuel Müller<sup>3</sup>, Ralf T. Voegelé<sup>3</sup>, Volker Stefanski<sup>2</sup>, Julia Steuber<sup>1\*</sup>**

<sup>§</sup> These authors contributed equally.

<sup>1</sup>Institute of Microbiology, University of Hohenheim (Stuttgart), 70599 Stuttgart, Germany;

<sup>2</sup>Institute of Animal Husbandry and Animal Breeding, University of Hohenheim (Stuttgart), 70599 Stuttgart, Germany;

<sup>3</sup>Institute of Phytomedicine, University of Hohenheim (Stuttgart), 70599 Stuttgart, Germany;

<sup>#</sup> Present address: Petra Halang, Medical Microbiology, Lund University, 20502 Malmö, Sweden

## **Supporting Information**

\*Address correspondence to:

Julia Steuber Institute of Microbiology, University of Hohenheim (Stuttgart), 70599 Stuttgart, Germany

Phone: +49 711 459 22228; Fax: +49 711 459 22238

E-mail: [julia.steuber@uni-hohenheim.de](mailto:julia.steuber@uni-hohenheim.de)

**Figure S1 Confirmation of the *qseC* deletion in the *V. cholerae* mutant by colony PCR.**

From left to right: two *V. cholerae* mutant strains (designated 5 and 6); the *V. cholerae* reference strain containing *qseC*; *E. coli* strain  $\beta$ 3914 and *E. coli* strain MFDpir harboring plasmid pSW7848 containing the *qseC* fragment used for construction of the deletion.

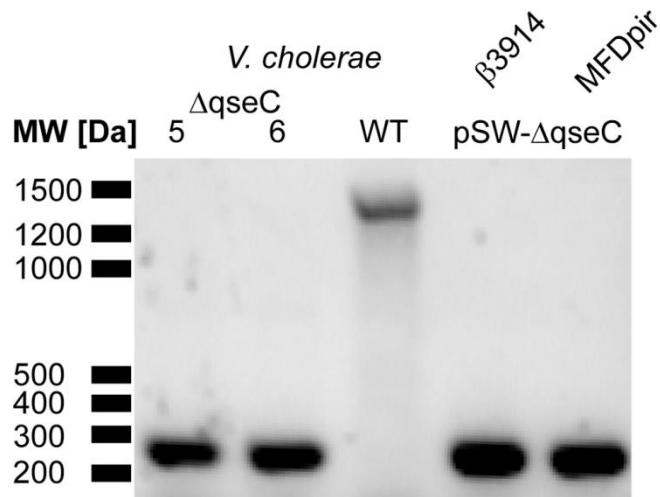

**Figure S2: qRT-PCR products of *rssA*, *qseC* and *pomB* in *V. cholerae* grown in different media.** Upper panel: To confirm the size of the qRT-PCR products, and to test the efficiency of primers for the indicated target genes (*rssA*, *qseC*, *pomB*), reactions were performed with decreasing concentrations of cDNA using cells grown in LB. From left to right; 2.5 ng, 0.25 ng, 0.025 ng, 0.0025 ng cDNA. Lower panel: qRT-PCR products of the indicated target genes using cDNA (2.5 ng) from cells grown in heat-treated serum (1), serum-SAPI with 0.1 mM FeSO<sub>4</sub> (2), serum-SAPI with 0.1 mM epinephrine (3) and serum-SAPI with 0.1 mM norepinephrine (4). The qRT-PCR products from *rssA*, *qseC* and *pomB* using cDNA (2.5 ng) from *V. cholerae* grown in LB without added catecholamines are shown as control.

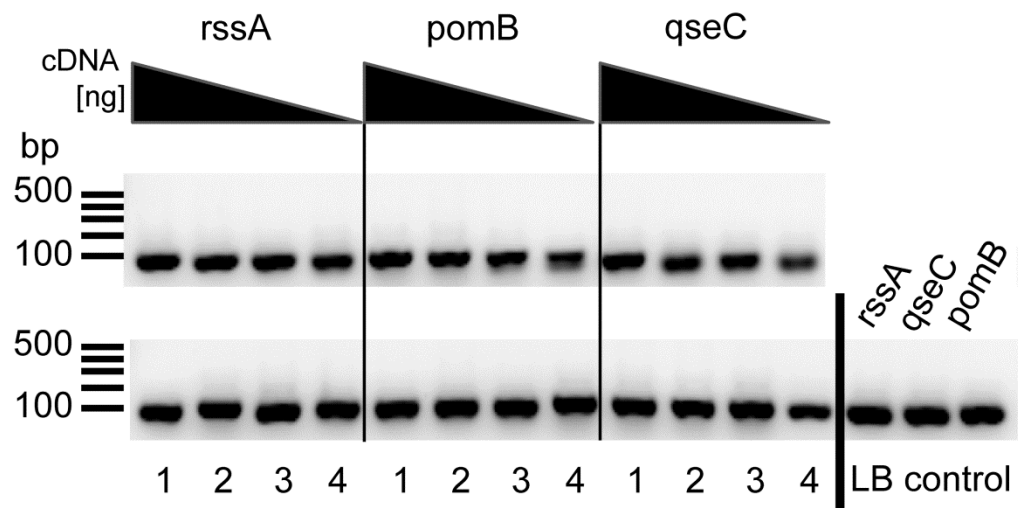

**Table S1: Oligonucleotides used in this study**

| <b>Name</b>       | <b>Sequence</b>                   |
|-------------------|-----------------------------------|
| rssA fwd          | ACCGGAGGAAGGTGGGGACG              |
| rssA rev          | CTCGCGGTATCGCTGCCCTC              |
| gap fwd           | CTGAAGGCGAACTGGCTGGT              |
| gap rev           | AGTGCGATACCTGCGTCAGCA             |
| qseC fwd          | TACTGGGGCCGCGATTGACG              |
| qseC rev          | TCGACATGCCAAGCCCTGCG              |
| pomB fwd          | CGCAGTTTCGGTGGCGCAAG              |
| pomB rev          | TGCCCCGTTGCGCTTCGGTAT             |
| qseC up fwd BamHI | AAGGATCCAACGCCGACTTACCCTGACTTCTGT |
| qseC up fwd       | ACGCCGACTTACCCTGACTTCTGT          |
| qseC up rev       | TTGGCGGACTGCCCAAGACG              |
| qseC do fwd       | AAGACGTCGGATACTGGGGCCGCGAT        |
| qseC do rev       | TCGACATGCCAAGCCCTGCG              |
| pJET1.2 fwd       | CGACTCACTATAGGGAGAGCGGC           |
| pJET1.2 rev       | AAGAACATCGATTTTCCATGGCAG          |
